# Supplementary material for: A solid phase extraction column based on SiO2@ZIF-8 for efficient analysis of domoic acid toxins in the seawater environment: experiments and DFT calculations on adsorption behaviour
Source: Royal Society of Chemistry journal article supplement (doi:10.1039/d3ay01768k), 2023-01-01
Supplement: d3ay01768k1.pdf [file d3ay01768k1.pdf]

# **A solid phase extraction column based on SiO<sub>2</sub>@ZIF-8 for efficient analysis of domoic acid toxins in seawater: Experiment and DFT calculation on adsorption behavior**

Jin-Hua Xu<sup>a</sup>, Ya-ping Wu<sup>a</sup>, Shi-Ye Xie<sup>a</sup>, Hui Chen<sup>a</sup>, Qing-Qing Ding<sup>a</sup>, Wen-Min  
Zhang<sup>b</sup> and Lan Zhang<sup>a\*</sup>

<sup>a</sup> Ministry of Education Key Laboratory for Analytical Science of Food Safety and  
Biology, Fujian Province Key Laboratory of Analysis and Detection Technology for  
Food Safety, College of Chemistry, Fuzhou University, Fuzhou, Fujian, 350116,  
China

<sup>b</sup> Department of Chemistry and Biotechnology, Minjiang Teachers College, Fuzhou,  
Fujian, 350108, China

● **Corresponding author:** Lan Zhang

● **Postal address:** College of Chemistry, Fuzhou University,

Fuzhou, Fujian, 350116, China

● **Tel:** 86-591-22866135

● **Fax:** 86-591-22866135

**E-mail:** zlan@fzu.edu.cn (L. Zhang)

## 1. Experimental section

### 1.1 Method validation

1. **Selectivity:** By comparing the chromatographic response of blank matrix and series of samples spiked with limit of quantitation (LOQ), low quality control (LQC) and medium quality control (MQC) of ZEN.

2. **Linearity and LOQ:** To establish linearity, six concentrations within a certain range were used to investigate the linear regression equation. The LOQ was determined to be acceptable after five replicates of the lowest calibration standard with the accuracy and precision deviations of <20%.

3. **Precision and accuracy:** The intra- and inter-assay accuracy and precision were evaluated with five replicates at three QC levels to assess the precision and accuracy. Accuracy was indicated by using the percent relative error (RE, %) and the precision was calculated by the percent coefficient of variation (CV, %).

4. **System suitability test (SST):** With guidelines for United States Pharmacopeia (USP), the system suitability test (SST) was implemented to evaluate the performance of the analysis system. According to the reference [*Natural product communications*, 7 (2012) 991-994.], a series of parameters such as theoretical plates (N), tailing factor (T), sensitivity and precision were examined. The calculation formula for these parameters were shown in Table S2.

### 1.2 System suitability test (SST)

According to the reference (*Natural product communications*, 7 (2012) 991-994), we will examine the system suitability from several parameters such as:

#### 1. Theoretical plates (N):

$$N = 5.54 \left[ \frac{(t_R)}{W_{\frac{1}{2}}} \right]^2$$

$t_R$  was retention time and  $W_{\frac{1}{2}}$  is the peak width at half height. Theoretical plates should not fall below 2000.

#### 2. Resolution ( $R_S$ ):

$$R_S = \frac{tR_B - tR_A}{0.5(W_A + W_B)}$$

Where  $tR_B$  and  $tR_A$  are retention times of peaks A and B, Peak widths  $W_A$  and  $W_B$  are obtained from the intersection of tangents with baseline. Resolution is considered complete if it

equals or exceeds 1.5

**3. Tailing factor (T) :**

$$T = \frac{a+b}{2a}$$

a and b are the widths at 5% of peak height. T should be less than or equal to 2 to satisfy the system suitability requirement.

**4. Sensitivity**

Sensitivity of the method was tested by examining the LOD and LOQ. LOD is used for qualitative analysis, the signal of the sample is 3 times the noise in the blank sample (ratio of signal to noise (S/N)=3); LOQ is used for quantitative analysis (S/N=3).

**1.3 interference experiments**

The effect of different salt ions was investigated by the addition of various cations (Na<sup>+</sup> and Mg<sup>2+</sup> ) and anions (Cl<sup>-</sup> and SO<sub>4</sub><sup>2-</sup>) at different concentrations (10-200 mmol/L), while other conditions were kept optimal. Relative tolerances for DA recoveries were set to less than 10%.

## 2. Date

**Table S1** Chromatographic conditions

| Project                         | condition                      |
|---------------------------------|--------------------------------|
| Chromatographic column          | Thermo Fisher Hypersil GOLD aQ |
| Column temperature              | 25 °C                          |
| Flow rate                       | 200 µL/min                     |
| Injection volume                | 10 µL                          |
| Elution procedure               | Equal elution                  |
| The mobile phase A              | 0.1 % FA aqueous solution      |
| The mobile phase B              | 0.1 % FA acetonitrile solution |
| Mobile phase A : mobile phase B | 80%: 20%                       |

**Table S2** Mass spectrometry conditions

| Project                     | condition                                                       |
|-----------------------------|-----------------------------------------------------------------|
| Ion source                  | ESI positive ion mode                                           |
| Spray voltage               | 3000 V                                                          |
| Capillary temperature       | 350 °C                                                          |
| Vaporization temperature    | 300 °C                                                          |
| Auxiliary gas               | 10 bar                                                          |
| Sheath gas                  | 35 bar                                                          |
| Scanning mode               | SRM                                                             |
| Collision energy            | 16 eV                                                           |
| Tube lens                   | 96 V                                                            |
| Analysis of ion transitions | m/z 312→248 for qualification<br>m/z 312→266 for quantification |

**Table S3** Calibration equation, limitation of detection (LOD) and limit of quantitation (LOQ) \*

| Linear range (ng/L) | Calibration equation                      | Correlation coefficient (R) | LOD (ng/L) | LOQ (ng/L) |
|---------------------|-------------------------------------------|-----------------------------|------------|------------|
| 12.0~5000.0         | $y=1197.51(\pm 22.99)x+212.95(\pm 25.52)$ | 0.9999                      | 4.0        | 12.0       |

**Table S4** System suitability parameters for Apt@PSM monolithic column coupled to HPLC

| Compounds | Retention time<br>(min) | Theoretical<br>plates | Tailing<br>factor | Sensitivity<br>(ng/L) | Precision*<br>(%, n = 6) |
|-----------|-------------------------|-----------------------|-------------------|-----------------------|--------------------------|
| DA        | 2.72                    | 11038                 | 0.99              | 4.0                   | 3.8                      |

\*: Precision was calculated through the relative standard deviation (RSD) of six replicate injections.

**Table S5** The interference of ionic species on the determination of DA.

| Ionic species                      | Tolerance level (mmol/L) |
|------------------------------------|--------------------------|
| Cl <sup>-</sup> 、Na <sup>+</sup> 、 | 200                      |
| Mg <sup>2+</sup>                   | 120                      |
| SO <sub>4</sub> <sup>2-</sup>      | 80                       |



**Table S6** Comparison of SiO<sub>2</sub>@ZIF-8 with other reported adsorbents.

| Adsorbents                                     | Pretreatment method | LODs (ng/L) | Linear range (ng/L) | Recovery (%)            | Ref.         |
|------------------------------------------------|---------------------|-------------|---------------------|-------------------------|--------------|
| Octadecyl                                      | SPE                 | 5.0         | 25.0-7500.0         | 94±2%-<br>99±2%         | [30]         |
| magnetic<br>molecularly<br>imprinting polymers | MSPE                | 50000.0     | 100000.0-6000000.0  | 90.5%-<br>92.1%         | [31]         |
| magnetic<br>molecularly<br>imprinted silica    | MSPE                | 200000.0    | 100000.0-6200000.0  | 87.6±7.0%-<br>88.3±6.2% | [33]         |
| SiO <sub>2</sub> @ZIF-8                        | SPE                 | 4.0         | 12.0-5000.0         | 86.1±3.2%-<br>93.6±1.1% | This<br>work |

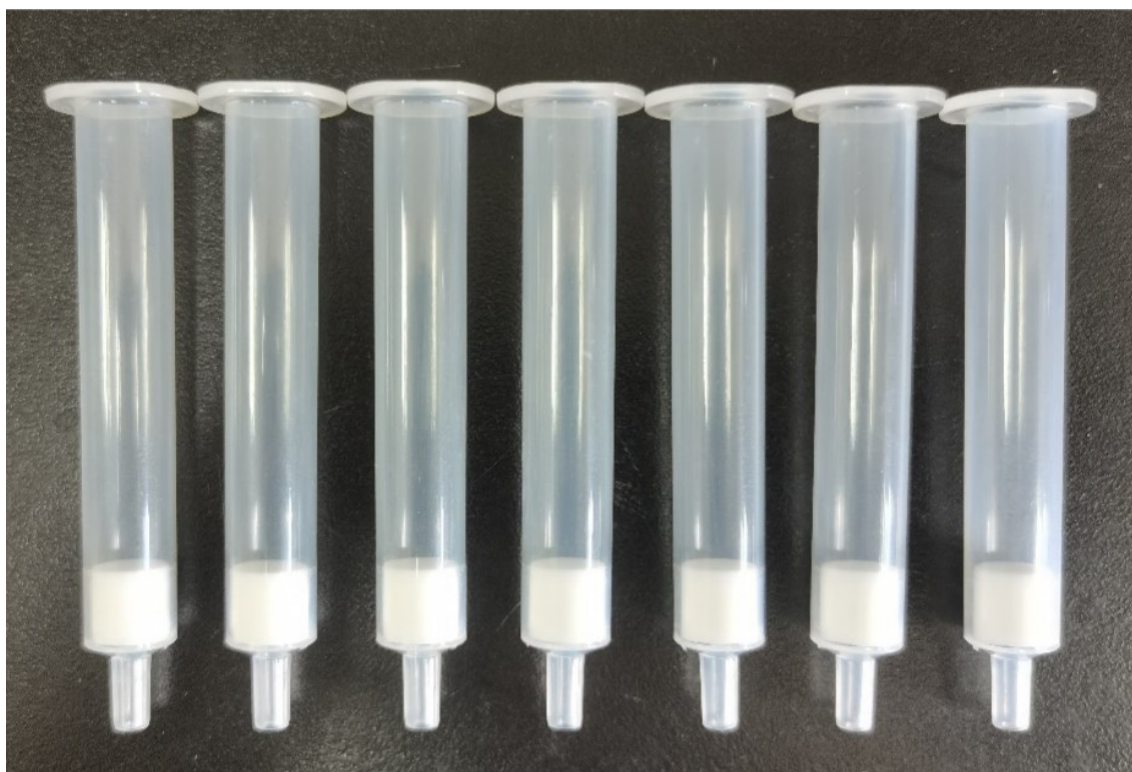

**Figure S1** The physical map of  $\text{SiO}_2@ZIF-8$  column

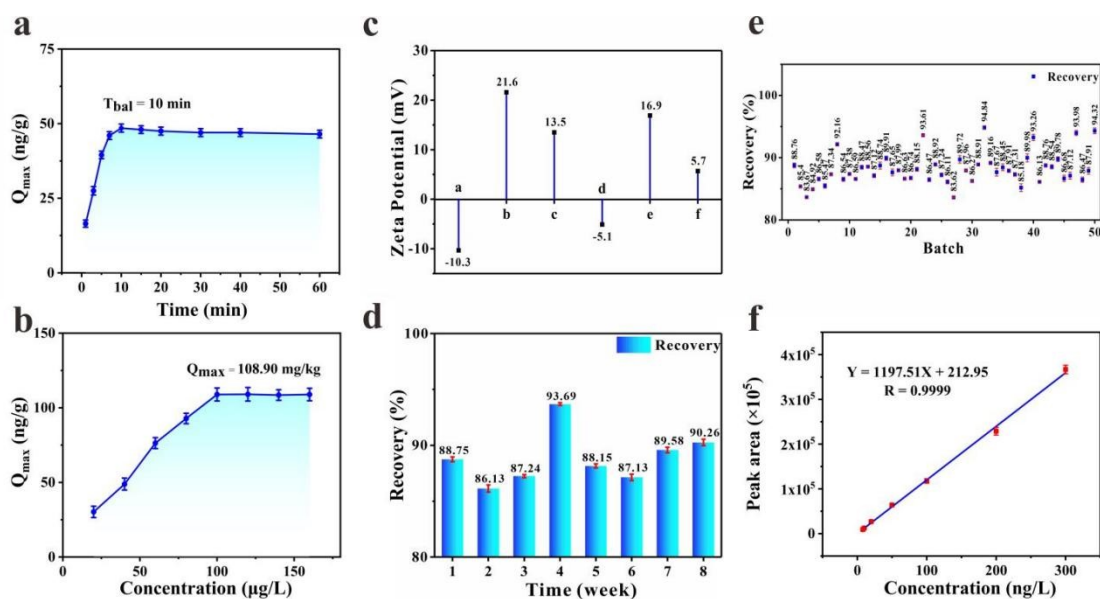

**Figure S2** (a) The adsorption dynamics curve of DA by SiO<sub>2</sub>@ZIF-8, (b) The adsorption isotherm, (c) Zeta potential of a: DA, b: ZIF-8, c: ZIF-8 after adsorbing DA, d: SiO<sub>2</sub>, e: SiO<sub>2</sub>@ZIF-8 and f: SiO<sub>2</sub>@ZIF-8 after adsorbing DA, (d) Recovery rates of SiO<sub>2</sub>@ZIF-8 columns from same batches, (e) Recovery rates of SiO<sub>2</sub>@ZIF-8 columns from different batches, (f) Standard work curve of DA in seawater.
